# Supplementary material for: Dynamic response of different types of gut microbiota to fructooligosaccharides and inulin
Source: Royal Society of Chemistry journal article supplement (doi:10.1039/d3fo04855a), 2024-01-01
Supplement: d3fo04855a2.xlsx [file d3fo04855a2.xlsx]

## Sheet: Table S1
Table S1：Subjects Characteristics at Baseline
Number	Age (y)	Sex (Female/male)	Height (cm)	Weight (Kg)	BMI (kg/m2)
D19	23	female	1.53	50	21.3593
D68	24	male	1.75	65	21.2245
D13	23	female	1.7	66.7	23.0796
D40	23	male	1.77	75.7	24.1629
D16	23	female	1.62	49	18.6709
D66	24	male	1.78	73	23.04
D45	20	male	1.68	56	19.8413
D34	20	female	1.7	66	22.8374
D37	23	female	1.6	65	25.3906
D39	20	male	1.8	80	24.6914
D49	22	female	1.72	66.5	22.4784
D12	23	male	1.84	78	23.0388
D30	18	female	1.63	56	21.0772
D67	24	male	1.76	70	22.5981
D36	23	female	1.65	62	22.7732
D35	24	male	1.7	68	23.5294
D43	26	female	1.63	56	21.0772
D50	24	female	1.71	60	20.5191
D60	24	male	1.82	80	24.1517
D6	20	female	1.65	51	18.7328
D18	23	male	1.88	70	19.8053
D7	20	female	1.6	54	21.0938
D15	24	male	1.7	53	18.3391
D65	22	female	1.65	53	19.4674
D21	23	male	1.75	65	21.2245
D33	20	male	1.65	50	18.3655
D25	22	male	1.68	65	23.03
D28	23	female	1.58	58	23.2335
D63	22	female	1.65	53	19.4674
D53	26	female	1.55	46	19.1467

## Sheet: Table S2
Table S2: The effect of prebiotics on bacterial taxa and CARGs abundance
	Scheirer-Ray-Hare Test			H-FOS																L-FOS																L-FOS			H-FOS				H-Inulin
	Treatment	Time	Interaction	0ha				6h				12h				24h				0ha				6h				12h				24h				Mean Δ (24-0h) Mean ± SD			Mean Δ (24-0h)b				0ha				6h
	p value	p value	p value	Mean	±	MD		Mean	±	MD		Mean	±	MD		Mean	±	MD		Mean	±	MD		Mean	±	MD		Mean	±	MD		Mean	±	MD					Mean ± SD				Mean	±	MD		Mean	±	MD
Bifidobacterium	0	0	0.42	2.74	±	1.29		17.57	±	2.21	**	19.81	±	0.96	**	19.06	±	1.74	**	3.75	±	1.87		50.93	±	6.2	**	42.13	±	6.99	**	52.46	±	3.18	**	48.7053	±	3.18238	16.3233	±	1.74123	**	2.32	±	1.85		23.35	±	5.04
Lactobacillus	0	0	0.93	5.14	±	4.43		0.57	±	0.61	*	0.06	±	0.1	**	0.14	±	0.18	**	22.79	±	9.83		3.68	±	4.42	**	3.24	±	5.4	**	0.46	±	0.29	**	-22.3313	±	0.286196	-5.00229	±	0.175092	**	5.77	±	7.3		0.09	±	0.18
Bacteroides	0	0	0.6	5.49	±	4.18		15.21	±	2.41	**	24.01	±	1.3	**	19.02	±	1.93	**	1.53	±	2.21		5.81	±	0.85	*	10.05	±	4.74	*	8.11	±	0.53	**	6.58188	±	0.534534	13.5309	±	1.92634	**	1.47	±	1.85		21.53	±	2.89
Ruminococcaceae UCG 014	0	0	0.62	4.26	±	3.93		0.26	±	0.36	*	0.01	±	0.03	**	0.03	±	0.06	**	16.79	±	5.46		1.27	±	2.06	**	1.57	±	2.54	**	0.06	±	0.1	**	-16.7284	±	0.0955325	-4.22985	±	0.0603825	**	2.14	±	3.02		0	±	0
Escherichia Shigella	0.3	0	0	37.36	±	11.46		16.57	±	0.86	**	14.34	±	0.87	**	16.21	±	1.28	**	5.74	±	4.69		18.46	±	1.99	**	24.26	±	1.81	**	22.99	±	0.99	**	17.2494	±	0.99077	-21.1485	±	1.28326	**	58.13	±	17.64		12.75	±	0.84
Sphingomonas	0.01	0	0.06	13.87	±	4.4		0.15	±	0.06	**	0.04	±	0.02	**	0.02	±	0.03	**	1.57	±	1.59		0.15	±	0.05	*	0.11	±	0.06	**	0.1	±	0.05	**	-1.46981	±	0.0531222	-13.8515	±	0.0296488	**	10.02	±	4.01		0.01	±	0.02
Fusobacterium	0	0	0.45	0.03	±	0.03		8.31	±	0.97	**	12.55	±	1.86	**	14.63	±	1.5	**	0.01	±	0.01		0.04	±	0.03	*	0.09	±	0.04	**	0.1	±	0.04	**	0.0882078	±	0.0394918	14.6009	±	1.50355	**	0.01	±	0.03		2.31	±	0.93
Akkermansia	0	0	0.94	2.22	±	1.25		0.15	±	0.19	**	0.05	±	0.08	**	0.03	±	0.06	**	6.65	±	1.98		0.76	±	0.85	**	0.83	±	1.3	**	0.11	±	0.12	**	-6.53829	±	0.120295	-2.18522	±	0.0614206	**	1.34	±	1.7		0.02	±	0.05
Lachnospiraceae NK4A136	0	0	0.26	1.17	±	1.07		0.14	±	0.13	*	0.02	±	0.03	**	0.08	±	0.14	**	6.04	±	2.73		0.81	±	0.96	**	0.93	±	1.44	**	0.01	±	0.02	**	-6.03165	±	0.020446	-1.08559	±	0.143483	**	0.69	±	0.94		0.02	±	0.04
Ruminococcus torques	0	0	0.8	0.54	±	0.41		3.91	±	0.46	**	5.34	±	0.55	**	7.14	±	0.99	**	0.05	±	0.1		0.95	±	0.09	**	1.14	±	0.42	**	1.3	±	0.18	**	1.24637	±	0.18228	6.60145	±	0.993187	**	0.64	±	0.74		4.47	±	0.47
Streptococcus	0	0	0.39	0.24	±	0.21		11.95	±	1.87	**	2.65	±	0.32	**	2.38	±	0.39	**	0.07	±	0.03		0.59	±	0.27	**	0.28	±	0.16	*	0.34	±	0.13	**	0.267681	±	0.129616	2.14315	±	0.394314	**	0.2	±	0.27		11.95	±	0.91
Alistipes	0	0	0.91	1.69	±	1.24		0.38	±	0.17	*	0.33	±	0.16	*	0.31	±	0.15	*	5.02	±	1.89		0.67	±	0.74	**	0.91	±	0.85	**	0.4	±	0.2	**	-4.61973	±	0.202732	-1.3783	±	0.152074	**	0.44	±	0.63		0.02	±	0.03
Ruminococcus gnavus	0	0.01	0.24	0.31	±	0.23		4.17	±	0.38	**	4.41	±	0.3	**	4.99	±	0.42	**	0.21	±	0.4		0.12	±	0.11		0.05	±	0.06		0.02	±	0.04	*	-0.192113	±	0.0438129	4.68311	±	0.420339	**	0.12	±	0.19		4.47	±	0.55
Dubosiella	0.12	0	0.82	0.76	±	0.77		0.08	±	0.14	*	0	±	0	**	0	±	0	**	2.51	±	2.88		0.03	±	0.04	**	0.06	±	0.07	**	0	±	0	**	-2.51	±	0	-0.76	±	1.21619e-16	**	0.66	±	0.8		0.01	±	0.02
Lactococcus	0	0	0.19	0	±	0		0.04	±	0.01	**	0.03	±	0.03	*	0.01	±	0.02	*	0	±	0		4.11	±	1.09	**	1.42	±	0.61	**	2.13	±	0.49	**	2.12712	±	0.492341	0.0137116	±	0.0213076	**	0	±	0		0.01	±	0.01
Klebsiella	0	0	0.21	0.13	±	0.13		0.79	±	0.11	**	0.69	±	0.08	**	0.56	±	0.14	**	0.14	±	0.27		2.23	±	0.23	**	1.61	±	0.69	**	1.91	±	0.3	**	1.77148	±	0.304298	0.432897	±	0.136961	**	0	±	0		0.59	±	0.11
Turicibacter	0.09	0	0.95	0.98	±	0.82		0.09	±	0.13	*	0.01	±	0.02	**	0	±	0	**	1.55	±	0.61		0.06	±	0.04	**	0.06	±	0.06	**	0.01	±	0.03	**	-1.53864	±	0.0278383	-0.98	±	1.21619e-16	**	0.84	±	0.78		0.01	±	0.02
Bacillus	0.08	0	0.45	1.58	±	0.72		0.01	±	0.01	**	0	±	0	**	0	±	0	**	0.22	±	0.23		0.01	±	0.02	**	0	±	0	**	0.02	±	0.02	**	-0.203515	±	0.0210264	-1.58	±	0	**	2.13	±	0.84		0	±	0
Megamonas	0	0	0.27	0.01	±	0.01		0.41	±	0.1	**	1.18	±	0.24	**	1.29	±	0.3	**	0	±	0.01		0.1	±	0.03	**	0.11	±	0.06	*	0.04	±	0.06	*	0.0449839	±	0.0559137	1.27887	±	0.300491	-	0.04	±	0.06		2.37	±	0.77
Faecalibacterium	0.14	0.17	0	3.02	±	1.97		0.9	±	0.26	*	0.37	±	0.21	*	0.33	±	0.13	*	1.56	±	2.89		0.59	±	0.12		0.84	±	0.23	*	0.7	±	0.14		-0.86176	±	0.141134	-2.69262	±	0.125736	-	1.57	±	1.52		0.69	±	0.21
Erysipelatoclostridium	0	0	0.03	0.11	±	0.09		1.81	±	0.15	**	0.64	±	0.14	**	2.4	±	0.53	**	0.12	±	0.07		0.53	±	0.13	**	0.06	±	0.05	*	0.21	±	0.11	*	0.0877418	±	0.114093	2.28558	±	0.52521	-	0	±	0		0.18	±	0.12
Sutterella	0	0	0.03	0.01	±	0.03		0.5	±	0.13	**	0.22	±	0.06	**	0.27	±	0.13	**	0.05	±	0.12		0.28	±	0.13	*	0.63	±	0.24	**	0.86	±	0.2	**	0.812916	±	0.204624	0.25577	±	0.128714	-	0	±	0		0.02	±	0.03
Parabacteroides	0	0	0.64	0.85	±	0.4		0.49	±	0.04	**	0.81	±	0.25		0.72	±	0.12		2.04	±	3.22		0.37	±	0.07	*	0.87	±	0.32		0.59	±	0.17	*	-1.45198	±	0.169492	-0.134638	±	0.122251	-	0.08	±	0.12		0.23	±	0.12
Erysipelotrichaceae UCG 003	0	0	0.47	0.12	±	0.14		0.66	±	0.1	**	0.32	±	0.09	*	1.93	±	0.42	**	0.02	±	0.02		0.11	±	0.02	**	0.13	±	0.11	*	0.17	±	0.07	**	0.145567	±	0.0663424	1.80651	±	0.41779	-	0.07	±	0.09		0.11	±	0.09
Romboutsia	0.14	0	0.3	1.05	±	1.63		0.02	±	0.04	*	0.01	±	0.02	*	0	±	0	**	0.04	±	0.07		0	±	0	*	0.01	±	0.02		0	±	0.01	*	-0.037727	±	0.00556765	-1.05	±	0	-	0.75	±	0.56		0.01	±	0.04
Collinsella	0	0	0.33	0.04	±	0.05		1.48	±	0.12	**	0.62	±	0.12	**	0.37	±	0.1	**	0.02	±	0.04		0.76	±	0.25	**	0.74	±	0.37	*	0.98	±	0.23	**	0.960951	±	0.227573	0.332917	±	0.10044	-	0.02	±	0.04		0.35	±	0.14
Mucispirillum	0	0	0.74	0.24	±	0.2		0.02	±	0.02	**	0	±	0	**	0	±	0	**	0.66	±	0.08		0.05	±	0.05	**	0.11	±	0.13	**	0.01	±	0.02	**	-0.651165	±	0.0216417	-0.24	±	0	-	0.15	±	0.23		0	±	0
Roseburia	0	0	0	0.36	±	0.28		0.39	±	0.2		0.74	±	0.12	*	0.18	±	0.29	*	0.5	±	0.3		0.06	±	0.12	**	0.82	±	0.17	*	0.39	±	0.4		-0.113675	±	0.402304	-0.176507	±	0.285759	-	0.09	±	0.21		1.75	±	0.43
Coriobacteriaceae UCG 002	0.44	0	0.87	0.27	±	0.33		0.01	±	0.03	*	0	±	0	*	0	±	0	*	0.33	±	0.1		0	±	0	**	0	±	0	**	0	±	0	**	-0.33	±	0	-0.27	±	0	-	0.29	±	0.33		0	±	0
Eubacterium xylanophilum	0.02	0	0.68	0.07	±	0.12		0	±	0	*	0	±	0	*	0	±	0	*	0.44	±	0.3		0.02	±	0.04	*	0.06	±	0.15	*	0	±	0	**	-0.44	±	0	-0.07	±	0	-	0.14	±	0.25		0	±	0
Ruminococcus 2	0.05	0	0.6	0.46	±	0.52		0.01	±	0.02	*	0.01	±	0.01	*	0.02	±	0.03	*	0.04	±	0.04		0	±	0	*	0	±	0.01	*	0	±	0	*	-0.04	±	0	-0.436536	±	0.0305643	-	0.46	±	0.48		0	±	0.01
Agathobacter	0.76	0	0	0.5	±	0.34		0.59	±	0.09	*	0.32	±	0.06	*	0.34	±	0.06	*	0.25	±	0.33		0.24	±	0.05	*	0.46	±	0.16	*	0.61	±	0.15	*	0.356327	±	0.150567	-0.164846	±	0.0583383	-	0.4	±	0.49		0.43	±	0.09
Fusicatenibacter	0	0.05	0.39	0.34	±	0.35		0.26	±	0.04		0.23	±	0.04		1.08	±	0.16	**	0.12	±	0.11		0.09	±	0.02		0.02	±	0.04	*	0.14	±	0.05		0.0150633	±	0.0543821	0.744152	±	0.163712	-	0.39	±	0.31		0.18	±	0.1
Rikenella	0.32	0	0.16	0.12	±	0.16		0	±	0.01	*	0	±	0	*	0	±	0	*	0.31	±	0.15		0	±	0	**	0	±	0	**	0	±	0	**	-0.31	±	0	-0.12	±	0	-	0.05	±	0.11		0	±	0
Clostridium sensu stricto	0	0.47	0.09	0.48	±	0.64		0.24	±	0.06		0.12	±	0.05	*	0.12	±	0.06	*	0.32	±	0.28		0.28	±	0.07		0.51	±	0.17	*	0.57	±	0.15	*	0.249287	±	0.145605	-0.357742	±	0.0636123	-	0.11	±	0.2		0.07	±	0.05
Lachnospira	0	0	0.27	0.1	±	0.1		0.43	±	0.05	**	0.31	±	0.06	**	0.29	±	0.05	**	0.03	±	0.06		0.03	±	0.04		0.02	±	0.05		0.1	±	0.05	*	0.0724201	±	0.0485582	0.194354	±	0.0491034	-	0.08	±	0.14		0.38	±	0.2
Eubacterium coprostanoligenes	0.07	0	0.71	0.31	±	0.14		0	±	0	**	0	±	0	**	0	±	0	**	0.2	±	0.12		0.03	±	0.02	**	0	±	0.01	**	0	±	0	**	-0.2	±	0	-0.31	±	0	-	0.1	±	0.11		0	±	0
Anaerostipes	0	0.16	0.15	0.47	±	0.29		0.21	±	0.06	*	0.11	±	0.03	*	0.03	±	0.05	*	0.17	±	0.19		0	±	0	*	0.04	±	0.06	*	0.01	±	0.02	*	-0.163181	±	0.016703	-0.437659	±	0.0507558	-	0.35	±	0.41		0.36	±	0.19
Subdoligranulum	0	0.28	0.75	0.5	±	0.29		0.27	±	0.08	*	0.09	±	0.04	*	0.12	±	0.09	*	0.14	±	0.24		0.01	±	0.02	*	0	±	0	*	0.02	±	0.03	*	-0.123698	±	0.0252666	-0.379554	±	0.0890905	-	0.36	±	0.42		0.06	±	0.05
Odoribacter	0	0	0.02	0.16	±	0.15		0.05	±	0.02	*	0.02	±	0.02	*	0.01	±	0.02	*	0.34	±	0.3		0	±	0	**	0.01	±	0.01	*	0.01	±	0.02	*	-0.326666	±	0.0206644	-0.145717	±	0.0221815	-	0	±	0.01		0	±	0
Eubacterium hallii	0	0.18	0.19	0.37	±	0.4		0.14	±	0.05	*	0.19	±	0.06		0.16	±	0.09		0.2	±	0.22		0	±	0.01	*	0	±	0	**	0	±	0	**	-0.2	±	0	-0.207313	±	0.0891917	-	0.4	±	0.52		0.22	±	0.13
Prevotella 9	0	0.13	0.08	0.05	±	0.08		0.01	±	0.01		0.01	±	0.02		0	±	0	*	0.69	±	1.54		0.57	±	0.07	*	0.46	±	0.11	*	0.56	±	0.14	*	-0.127917	±	0.136133	-0.05	±	7.60118e-18	-	0.03	±	0.08		0	±	0
Faecalibaculum	0.01	0	0.04	0.22	±	0.23		0.01	±	0.02	*	0	±	0	**	0.01	±	0.03	*	0.25	±	0.16		0	±	0	**	0.12	±	0.22	*	0	±	0	**	-0.25	±	0	-0.209432	±	0.0258853	-	0	±	0		0	±	0
Phascolarctobacterium	0	0	0.67	0.1	±	0.11		0.39	±	0.06	**	0.48	±	0.1	**	0.51	±	0.16	**	0.03	±	0.06		0.01	±	0.02		0.04	±	0.03	*	0.03	±	0.05		0.00329469	±	0.0458399	0.408487	±	0.158008	-	0.04	±	0.07		0.11	±	0.08
Catenibacterium	0	0.03	0.1	0	±	0		0.01	±	0.02	*	0	±	0		0	±	0		0.17	±	0.24		2.45	±	0.4	**	1.83	±	1.19	**	0.92	±	0.28	**	0.747676	±	0.283681	0	±	0	-	0	±	0		0	±	0
Lachnospiraceae ND3007	0	0	0.02	0	±	0		0.19	±	0.06	**	0.12	±	0.03	**	0.13	±	0.04	**	0	±	0		0	±	0		0	±	0		0	±	0		0	±	0	0.126615	±	0.0373884	-	0	±	0		0.36	±	0.1
Tyzzerella 4	0	0	0.05	0.04	±	0.04		2.22	±	0.36	**	3.19	±	1.24	**	0.29	±	0.06	**	0	±	0		0	±	0		0	±	0		0	±	0		0	±	0	0.251228	±	0.0606467	-	0	±	0		3.8	±	0.36
Blautia	0	0.96	0.39	2	±	1.62		2.17	±	0.57	*	2.47	±	0.66	*	2.42	±	0.51	*	0.97	±	0.9		0.14	±	0.1	*	0.19	±	0.1	*	0.16	±	0.15	*	-0.806364	±	0.153257	0.420856	±	0.505085	-	2.53	±	2.34		4.43	±	0.17
Candidatus Saccharimonas	0.01	0	0.01	0.02	±	0.04		0.01	±	0.02	*	0	±	0	*	0	±	0	*	0.28	±	0.1		0	±	0	**	0.01	±	0.03	**	0	±	0	**	-0.28	±	0	-0.02	±	0	-	0	±	0		0	±	0
Ruminiclostridium 5	0	0	0.29	0.03	±	0.03		0.01	±	0.02	*	0	±	0	*	0	±	0	*	0.26	±	0.21		0.01	±	0.02	**	0.03	±	0.04	**	0.02	±	0.02	**	-0.244487	±	0.0179028	-0.03	±	0	-	0	±	0		0	±	0
Morganella	0	0	0.05	0	±	0		0	±	0		0	±	0		0	±	0		0	±	0.01		0.03	±	0.03	*	0.2	±	0.11	*	0.19	±	0.03	**	0.186853	±	0.0342801	0	±	0	-	0	±	0		0	±	0
Ruminococcaceae UCG 002	0.14	0.04	0	0.34	±	0.25		0.13	±	0.05	*	0.01	±	0.03	*	0.01	±	0.02	*	0.2	±	0.46		0.11	±	0.04	*	0.07	±	0.06	*	0.05	±	0.05		-0.154696	±	0.0516789	-0.328533	±	0.0179514	-	0.1	±	0.16		0.01	±	0.02
Rikenellaceae RC9	0.03	0	0.05	0.04	±	0.07		0	±	0	*	0	±	0	*	0	±	0	*	0.15	±	0.05		0.01	±	0.02	**	0.01	±	0.02	**	0	±	0	**	-0.15	±	0	-0.04	±	0	-	0.01	±	0.03		0	±	0
Lachnoclostridium	0	0	0.19	0.02	±	0.04		0.29	±	0.04	**	0.3	±	0.08	**	0.17	±	0.1	*	0.04	±	0.09		0.01	±	0.02		0.02	±	0.03		0.03	±	0.05		-0.0106987	±	0.0490445	0.14881	±	0.0953887	-	0.01	±	0.03		0.23	±	0.15
Parasutterella	0	0.07	0.11	0.53	±	0.18		0.6	±	0.15		0.33	±	0.1	*	0.4	±	0.11	*	0.19	±	0.23		0.3	±	0.06	*	0.41	±	0.13	*	0.27	±	0.12	*	0.0821734	±	0.119476	-0.125403	±	0.114859	-	0.07	±	0.09		0.07	±	0.03
Coprococcus 3	0.05	0.05	0.06	0.09	±	0.12		0.08	±	0.03		0.01	±	0.02	*	0.01	±	0.02	*	0.05	±	0.05		0.03	±	0.03	*	0.04	±	0.04	*	0.02	±	0.03	*	-0.031751	±	0.0284248	-0.0771681	±	0.0199003	-	0.19	±	0.24		0.07	±	0.04
Enterococcus	0.02	0.01	0.76	0.08	±	0.08		0.12	±	0.21		0.08	±	0.12		0.01	±	0.02	*	0.08	±	0.1		0.01	±	0.01	*	0.01	±	0.03	*	0	±	0	*	-0.08	±	0	-0.0667443	±	0.0206571	-	0.1	±	0.13		0.01	±	0.01
Butyricicoccus	0	0.04	0.15	0.18	±	0.12		0.18	±	0.07		0.03	±	0.02	*	0.01	±	0.03	*	0.02	±	0.04		0.01	±	0.03		0	±	0	*	0	±	0.01	*	-0.015049	±	0.0121274	-0.169575	±	0.0255352	-	0.09	±	0.14		0.03	±	0.03
Ruminococcaceae UCG 013	0	0	0	0.17	±	0.11		0.07	±	0.02	*	0.01	±	0.02	*	0.03	±	0.02	*	0.07	±	0.05		0	±	0	**	0	±	0	**	0	±	0	**	-0.07	±	0	-0.141649	±	0.02313	-	0.06	±	0.16		0.02	±	0.02
Eubacterium ventriosum	0	0	0.02	0.15	±	0.1		0.08	±	0.04	*	0.01	±	0.02	*	0	±	0	**	0.03	±	0.03		0	±	0	*	0.01	±	0.02	*	0	±	0	*	-0.03	±	0	-0.15	±	0	-	0.05	±	0.13		0.02	±	0.04
Prevotella 2	0	0.02	0.23	0	±	0		0	±	0		0	±	0		0	±	0		0.11	±	0.24		0.18	±	0.04	*	0.14	±	0.06	*	0.18	±	0.04	*	0.0702321	±	0.0435427	0	±	0	-	0	±	0		0	±	0
Dialister	0	0.43	0.01	0.11	±	0.11		0	±	0.01	*	0	±	0	*	0	±	0	*	0.1	±	0.17		0.14	±	0.04	*	0.24	±	0.13	*	0.36	±	0.1	*	0.259003	±	0.0960331	-0.11	±	0	-	0.06	±	0.1		0	±	0
Alloprevotella	0	0.06	0.33	0.03	±	0.04		0.03	±	0.01		0.01	±	0.01		0.01	±	0.02	*	0.14	±	0.26		0.14	±	0.03	*	0.17	±	0.05	*	0.18	±	0.06	*	0.0406095	±	0.0577457	-0.0205938	±	0.0154282	-	0.03	±	0.04		0.01	±	0.02
Faecalitalea	0	0	0.01	0	±	0		0.29	±	0.09	**	0.09	±	0.02	**	0.15	±	0.06	**	0	±	0		0	±	0		0	±	0		0	±	0		0	±	0	0.152954	±	0.063326	-	0	±	0		0.09	±	0.05
Lachnospiraceae UCG 004	0	0.02	0.2	0.06	±	0.07		0.39	±	0.09	**	0.3	±	0.02	**	0.11	±	0.1	*	0.01	±	0.04		0	±	0	*	0	±	0	*	0	±	0	*	-0.01	±	0	0.0524899	±	0.100306	-	0.04	±	0.06		0.2	±	0.16
Eubacterium eligens	0	0.09	0.07	0.06	±	0.08		0.16	±	0.03	*	0.03	±	0.04		0	±	0	*	0	±	0		0	±	0		0	±	0		0	±	0		0	±	0	-0.06	±	0	-	0.05	±	0.09		0.05	±	0.06
Dorea	0	0.29	0.51	0.53	±	0.36		0.81	±	0.14	*	0.33	±	0.06	*	0.54	±	0.13		0.11	±	0.15		0.37	±	0.05	*	0.28	±	0.12	*	0.24	±	0.17	*	0.133703	±	0.169532	0.00789462	±	0.125021	-	0.54	±	0.57		0.27	±	0.15
Bilophila	0.04	0	0.13	0.02	±	0.02		0.04	±	0.03	*	0.05	±	0.01	*	0.03	±	0.03		0.06	±	0.06		0.02	±	0.03	*	0.03	±	0.02		0.01	±	0.02	*	-0.0511648	±	0.0216417	0.0063643	±	0.0301847	-	0.04	±	0.07		0	±	0
a Data were analysed by Wilcoxon test to assess the effect of prebiotics relative to baseline at different time points, *p<0.05, **p<0.01. Data are reported as mean ± standard deviation.
b Data were analysed by Wilcoxon test to assess differences in the extent to which prebiotics altered flora in different types of subjects. +p<0.1, *p<0.05, **p<0.01.
[truncated: 31 more columns]

## Sheet: Table S3
Table S3: Assessment of the growth of Bifidobacterium and Bacteroides species in FOS and inulin
Serial number	Year	Journal	Author	Findings	PMID
1	2023	FEMS Microbiology Ecology	Seongwon Cheon et al.	B. vulgatus, B. xylanisolvens, B. breve, B. longum and B. ovatus in order of reduced growth on FOS.	36623850
2	2021	Front. Microbiol	Robert Fultz et al.	B．ovatus can utilize inulin for growth.	34899632
3	2018	Applied and Environmental Microbiology	Audrey Rivière et al.	B. longum grew well in inulin and FOS, B. bifidum had limited growth in FOS and inulin, and B. adolescentis grew well in FOS and partially degraded inulin.	29500265
4	2010	Cell	Erica D Sonnenburg et al.	B. thetaiotaomicron was unable to utilize inulin efficiently but grew well on FOS.	20603004
5	2009	Applied and Environmental Microbiology	Gwen Falony et al.	B. breve, B. adolescentis and B. longum were co-cultured and fermented with B. thetaiotaomicron and were able to metabolize FOS and inulin.	19251883
6	2009	Applied and Environmental Microbiology	Gwen Falony et al.	B. adolescentis and B. longum degraded FOS and partially degraded inulin, while some B. bifidum and B. breve did not degrade FOS and inulin.	19011052
7	2006	Applied and Environmental Microbiology	Roel Van der Meulen et al.	B. longum grew slower than B. fragilis and B. thetaiotaomicron, and all three bacteria were able to utilize FOS.	16461642
